# Supplementary material for: Metabolic syndrome alters relationships between cardiometabolic variables, cognition and white matter hyperintensity load
Source: PubMed Central journal article supplement (PMC6416472; doi:10.1038/s41598-019-40630-6), 2019-03-13
Supplement: 41598_2019_40630_MOESM1_ESM.pdf [file 41598_2019_40630_MOESM1_ESM.pdf]

**Metabolic syndrome alters relationships between cardiometabolic variables, cognition  
and white matter hyperintensity load**

Alkan, E.<sup>1</sup>, Taporoski, T.P.<sup>2</sup>, Sterr, A.<sup>1</sup>, von Schantz, M.<sup>1,3</sup>, Vallada, H.<sup>3</sup>, Krieger, J. E.<sup>2</sup>,  
Pereira, A.C.<sup>2</sup>, Alvim, R.<sup>2</sup>, Horimoto, A.R.V.R.<sup>2</sup>, Pompéia, S.<sup>4</sup>, Negrão, A.B.<sup>2</sup>,  
Evans, S<sup>1\*</sup>.

<sup>1</sup> Faculty of Health and Medical Sciences, University of Surrey, Guildford, Surrey, United  
Kingdom

<sup>2</sup> Laboratory of Genetics and Molecular Cardiology, Heart Institute (Incor), University of São  
Paulo Medical School, São Paulo, Brazil

<sup>3</sup> Institute of Psychiatry, University of São Paulo Medical School, São Paulo, Brazil

<sup>4</sup> Departamento de Psicobiologia, Universidade Federal de São Paulo, São Paulo, Brazil

**\*Corresponding author.**

**Dr. Simon Evans**

**email: [se0016@surrey.ac.uk](mailto:se0016@surrey.ac.uk)**

**phone:01483 686945**

**Supplementary Materials**

**Results of Stepwise Regression Analyses**

**Table S1** Variables Predicting WMH volume for All Subjects

| <i>Model</i> | <i>Predictor</i> | <i>B</i> | <i>SE</i> | $\beta$ | <i>T</i> | <i>R</i> | <i>R</i> <sup>2</sup> | $\Delta R^2$ | <i>F</i> | <i>p</i> |
|--------------|------------------|----------|-----------|---------|----------|----------|-----------------------|--------------|----------|----------|
| 1            | Constant         | -5.124   | 1.052     |         | -4.870   |          |                       |              |          |          |
|              | Age              | .102     | .017      | .422    | 5.852    | .422     | .178                  | .178         | 34.247** | .000     |
| 2            | Constant         | -7.214   | 1.277     |         | -5.650   |          |                       |              |          |          |
|              | Age              | .086     | .018      | .359    | 4.842    |          |                       |              |          |          |
|              | SBP              | .023     | .008      | .206    | 2.772    | .465     | .216                  | .038         | 7.685*   | .006     |

\*\* $p < .01$ . \* $p < .05$  SBP, Systolic BP

**Table S2** Variables Predicting WMH Number for All Subjects

| <i>Model</i> | <i>Predictor</i> | <i>B</i> | <i>SE</i> | $\beta$ | <i>T</i> | <i>R</i> | <i>R</i> <sup>2</sup> | $\Delta R^2$ | <i>F</i> | <i>p</i> |
|--------------|------------------|----------|-----------|---------|----------|----------|-----------------------|--------------|----------|----------|
| 1            | Constant         | -11.228  | 2.533     |         | -4.433   |          |                       |              |          |          |
|              | Age              | .268     | .042      | .454    | 6.406    | .454     | .206                  | .206         | 41.033** | .000     |
| 2            | Constant         | -13.026  | 2.578     |         | -5.054   |          |                       |              |          |          |
|              | Age              | .255     | .041      | .433    | 6.187    |          |                       |              |          |          |
|              | FBG              | .025     | .009      | .185    | 2.643    | .490     | .240                  | .034         | 6.984*   | .034     |

\*\* $p < .01$ . \* $p < .05$ . FBG, Fasting Blood Glucose

**Table S3** Variables Predicting WL: Total for All Subjects

| <i>Model</i> | <i>Predictor</i> | <i>B</i> | <i>SE</i> | <i>B</i> | <i>t</i> | <i>R</i> | <i>R<sup>2</sup></i> | <i>ΔR<sup>2</sup></i> | <i>F</i> | <i>p</i> |
|--------------|------------------|----------|-----------|----------|----------|----------|----------------------|-----------------------|----------|----------|
| 1            | Constant         | 18.403   | .364      |          | 50.603   |          |                      |                       |          |          |
|              | WMH<br>Volume    | -.360    | .171      | -.166    | -2.114   | .166     | .027                 | .027                  | 4.468*   | .036     |

\* $p < .05$ . WMH, White Matter Hyperintensities

**Table S4** Variables Predicting WL:Immediate Scores for All Subjects

| <i>Model</i> | <i>Predictor</i> | <i>B</i> | <i>SE</i> | <i>β</i> | <i>t</i> | <i>R</i> | <i>R<sup>2</sup></i> | <i>ΔR<sup>2</sup></i> | <i>F</i> | <i>p</i> |
|--------------|------------------|----------|-----------|----------|----------|----------|----------------------|-----------------------|----------|----------|
| 1            | Constant         | 5.713    | .610      |          | 9.371    |          |                      |                       |          |          |
|              | HbA1c            | -.220    | .098      | -.175    | -2.233   | .175     | .031                 | .031                  | 4.987*   | .027     |

\* $p < .05$ .

**Table S5** Variables Predicting WL:Learning Scores for All Subjects

| <i>Model</i> | <i>Predictor</i> | <i>B</i> | <i>SE</i> | <i>β</i> | <i>t</i> | <i>R</i> | <i>R<sup>2</sup></i> | <i>ΔR<sup>2</sup></i> | <i>F</i> | <i>p</i> |
|--------------|------------------|----------|-----------|----------|----------|----------|----------------------|-----------------------|----------|----------|
| 1            | Constant         | 2.622    | .220      |          | 11.919   |          |                      |                       |          |          |
|              | Education        | .073     | .029      | .197     | 2.532    | .197     | .039                 | .039                  | 6.410*   | .012     |

\* $p < .05$ .

---

**Table S6** Variables Predicting WMH Volume for Subjects with Metabolic Syndrome

| <i>Model</i> | <i>Predictor</i> | <i>B</i> | <i>SE</i> | $\beta$ | <i>t</i> | <i>R</i> | <i>R</i> <sup>2</sup> | $\Delta R^2$ | <i>F</i> | <i>p</i> |
|--------------|------------------|----------|-----------|---------|----------|----------|-----------------------|--------------|----------|----------|
| 1            | Constant         | -6.692   | 2.378     |         | -2.815   |          |                       |              |          |          |
|              | Age              | .133     | .039      | .417    | 3.428    | .417     | .173                  | .173         | 11.754** | .000     |

---

\*\**p* < .01.

**Table S7** Variables Predicting WMH Number for Subjects with Metabolic Syndrome

| <i>Model</i> | <i>Predictor</i> | <i>B</i> | <i>SE</i> | $\beta$ | <i>t</i> | <i>R</i> | <i>R</i> <sup>2</sup> | $\Delta R^2$ | <i>F</i> | <i>p</i> |
|--------------|------------------|----------|-----------|---------|----------|----------|-----------------------|--------------|----------|----------|
| 1            | Constant         | -14.107  | 5.021     |         | -2.810   |          |                       |              |          |          |
|              | Age              | .324     | .082      | .467    | 3.957    | .467     | .218                  | .218         | 15.654** | .000     |

---

\*\**p* < .01.

**Table S8** Variables Predicting WL: Learning Scores for Subjects with Metabolic Syndrome

| <i>Model</i> | <i>Predictor</i> | <i>B</i> | <i>SE</i> | $\beta$ | <i>t</i> | <i>R</i> | <i>R</i> <sup>2</sup> | $\Delta R^2$ | <i>F</i> | <i>p</i> |
|--------------|------------------|----------|-----------|---------|----------|----------|-----------------------|--------------|----------|----------|
| 1            | Constant         | 2.504    | .301      |         | 8.326    |          |                       |              |          |          |
|              | Education        | .126     | .041      | .383    | 3.100    | .383     | .146                  | .146         | 9.609*   | .003     |

---

\*\**p* < .01.

**Table S9** Variables Predicting WMH Volume for Subjects without Metabolic Syndrome

| <i>Model</i> | <i>Predictor</i> | <i>B</i> | <i>SE</i> | $\beta$ | <i>t</i> | <i>R</i> | <i>R</i> <sup>2</sup> | $\Delta R^2$ | <i>F</i> | <i>p</i> |
|--------------|------------------|----------|-----------|---------|----------|----------|-----------------------|--------------|----------|----------|
| 1            | Constant         | -3.952   | .898      |         | -4.402   |          |                       |              |          |          |
|              | Age              | .079     | .015      | .466    | 5.270    | .466     | .217                  | .217         | 27.772** | .000     |

\*\* $p < .01$ .

**Table S10** Variables Predicting WMH Number for Subjects without Metabolic Syndrome

| <i>Model</i> | <i>Predictor</i> | <i>B</i> | <i>SE</i> | $\beta$ | <i>t</i> | <i>R</i> | <i>R</i> <sup>2</sup> | $\Delta R^2$ | <i>F</i> | <i>p</i> |
|--------------|------------------|----------|-----------|---------|----------|----------|-----------------------|--------------|----------|----------|
| 1            | Constant         | -9.121   | 2.742     |         | -3.327   |          |                       |              |          |          |
|              | Age              | .227     | .046      | .446    | 4.984    | .446     | .199                  | .199         | 24.837** | .000     |

\*\* $p < .01$ .

**Table S11** Variables Predicting WL: Total for Subjects without Metabolic Syndrome

| <i>Model</i> | <i>Predictor</i>     | <i>B</i> | <i>SE</i> | $\beta$ | <i>t</i> | <i>R</i> | <i>R</i> <sup>2</sup> | $\Delta R^2$ | <i>F</i> | <i>p</i> |
|--------------|----------------------|----------|-----------|---------|----------|----------|-----------------------|--------------|----------|----------|
| 1            | Constant             | 24.839   | 3.391     |         | 7.325    |          |                       |              |          |          |
|              | HbA1c                | -1.153   | .581      | -.195   | -1.986   | .195     | .038                  | .038         | 3.944*   | .050     |
| 2            | Constant             | 23.607   | 3.375     |         | 6.995    |          |                       |              |          |          |
|              | HbA1c                | -1.311   | .574      | -.221   | -2.282   |          |                       |              |          |          |
|              | Triglyceride         | .018     | .008      | .213    | 2.198    | .288     | .083                  | .045         | 4.830*   | .030     |
| 3            | Constant             | 23.111   | 3.321     |         | 6.959    |          |                       |              |          |          |
|              | HbA1c                | -1.054   | .576      | -.178   | -1.829   |          |                       |              |          |          |
|              | Triglyceride         | .023     | .008      | .275    | 2.766    |          |                       |              |          |          |
|              | Number of Components | -1.249   | .575      | -.220   | -2.172   | .353     | .125                  | .042         | 4.716*   | .032     |

---

\* $p < .05$

**Table S12** Variables Predicting WL: Learning for Subjects without Metabolic Syndrome

| <i>Model</i> | <i>Predictor</i> | <i>B</i> | <i>SE</i> | $\beta$ | <i>t</i> | <i>R</i> | <i>R</i> <sup>2</sup> | $\Delta R^2$ | <i>F</i> | <i>p</i> |
|--------------|------------------|----------|-----------|---------|----------|----------|-----------------------|--------------|----------|----------|
| 1            | Constant         | 2.122    | .438      |         | 4.844    |          |                       |              |          |          |
|              | Triglyceride     | .007     | .003      | .203    | 2.078    | .203     | .041                  | .041         | 4.318*   | .040     |
| 2            | Constant         | 5.034    | 1.518     |         | 3.316    |          |                       |              |          |          |
|              | Triglyceride     | .007     | .003      | .195    | 2.018    |          |                       |              |          |          |
|              | SBP              | -.023    | .011      | -.193   | -2.001   | .280     | .079                  | .037         | 4.003*   | .048     |

\* $p < .05$ . SBP, Systolic BP
